# Supplementary material for: Surface nitriding to improve the catalytic performance of FeNi3 for the oxygen evolution reaction
Source: Royal Society of Chemistry journal article supplement (doi:10.1039/d2cc04367j), 2022-01-01
Supplement: d2cc04367j1.pdf [file d2cc04367j1.pdf]

# Supporting Information

## Surface Nitriding to Improve the Catalytic Performance of FeNi<sub>3</sub> for Oxygen Evolution Reaction

Yucan Dong, Qun Liu, Caiyun Qi, Guoqiang Zhang, Xingdong Jiang\* and Daqiang Gao\*

Key Laboratory for Magnetism and Magnetic Materials of MOE, Key Laboratory of Special Function Materials and Structure Design of MOE, Lanzhou University, Lanzhou 730000, People's Republic of China. E-mail: jiangxd@lzu.edu.cn

### Experimental

#### Synthesis

The FeNi<sub>3</sub> precursor was synthesized by hydrothermal method. First, add (0.2703g) FeCl<sub>3</sub> 6H<sub>2</sub>O, (0.7138g) NiCl<sub>2</sub> 6H<sub>2</sub>O, (0.6362 g) urea and (0.9 g) ammonium fluoride into 80 mL of deionized water, stir until totally dissolved, then transfer the mixed solution to 100 mL Incubated at 180°C for 12 hours in a Teflon-lined stainless steel autoclave. The prepared precursors were washed three times with absolute ethanol and ultrapure water, respectively, and treated at 60°C overnight. Finally, (100 mg) of the FENI3 precursor was incubated in a tube furnace at 450 °C for 3 hours under a hydrogen environment to prepare FeNi<sub>3</sub>. Furthermore, N-450, N-500 and N-525 samples were prepared by incubating the FeNi<sub>3</sub> precursor at 450, 500 and 525 °C for 3 hours in an ammonia atmosphere, respectively<sup>1,2</sup>.

#### Characterization

Scanning electron microscopy (SEM; TESCAN MIRA3), transmission electron microscopy (TEM; Tecnai G2 F30, FEI) and EDX embedded in the SEM were utilized to observe the microscopic morphology of the samples and the elemental map of the catalyst. X-ray diffraction (X'pert Pro Philips) and Raman spectrometer (LabRAM HR Evolution) in the wavenumber of 100-900 cm<sup>-1</sup> was used to analyze the crystal structure of the catalyst and the elemental valence states of the samples analyzed by XPS (Kratos AXIS Ultra). Finally, the catalytic performance of the samples was tracked by the electrochemical workstation (CHI 660E).

#### Electrochemical measurements

The catalytic performance of the samples was tested at room temperature in an alkaline solution with a three-electrode system which were reference electrode (Ag/AgCl electrode), the counter electrode (platinum foil) and as the working

electrode (glassy carbon electrode). Electrode solution preparation is divided into two steps. First, 10 mg of carbon and 10 mg of catalyst were dispersed in 40 mL of petroleum ether for long-term ultrasonic treatment, and then 6 mg of the above dried sample was ultrasonically treated in 30  $\mu\text{L}$  of Nafion and 1470  $\mu\text{L}$  of DMF to synthesize electrode fluid. Finally, 9  $\mu\text{L}$  of the slurry was loaded onto the glassy carbon electrode in three portions. The potential was calibrated to RHE through Nernst Eq:  $E_{(\text{RHE})} = E_{\text{Ag/AgCl}} + 0.197 + 0.059 \cdot \text{pH}$ . Electrochemical impedance spectroscopy (EIS) was evaluated at a potential bias of 1.48 V against the RHE with a frequency range of 10 kHz to 0.01 Hz. In addition, the overpotential was calculated by the difference between the potential and 1.23V.<sup>3,4</sup>

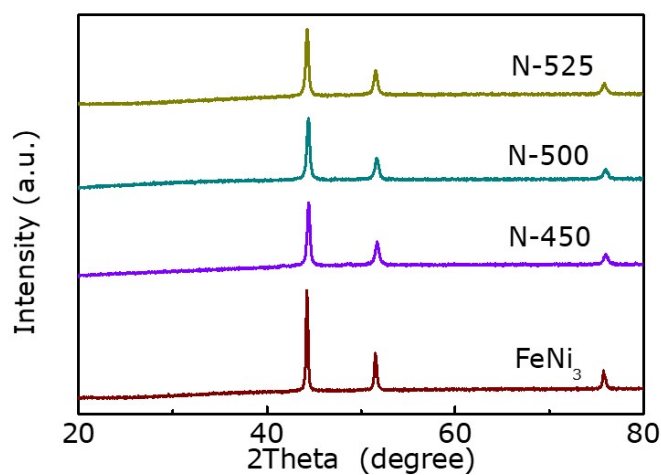

Figure S1. XRD patterns of all samples.

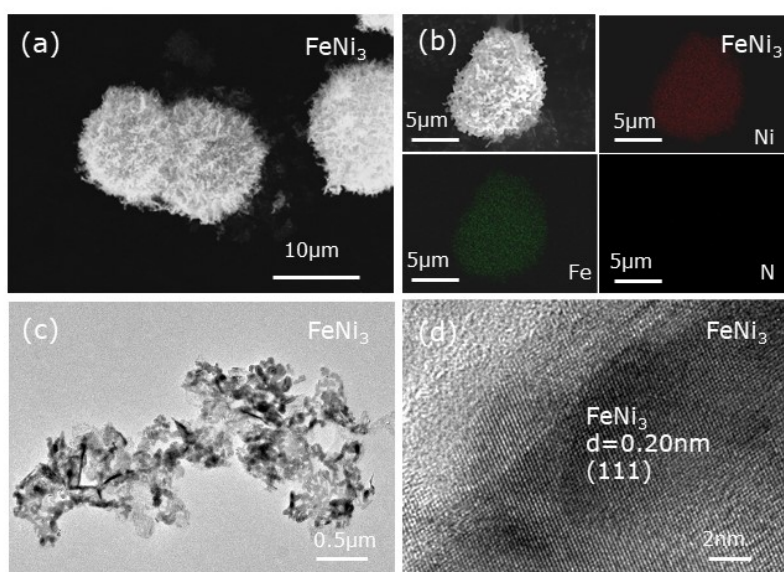

Figure S2 (a) SEM, (b) Element distributions, (c) TEM and (d) HRTEM images of FeNi<sub>3</sub>,

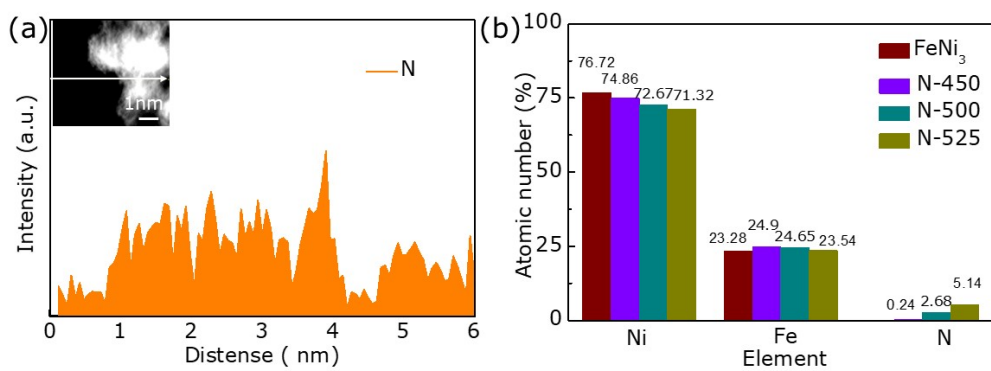

Figure S3 (a) EDX line scan of N element (the illustration is the scan area) and (b) EDS spectra of all samples.

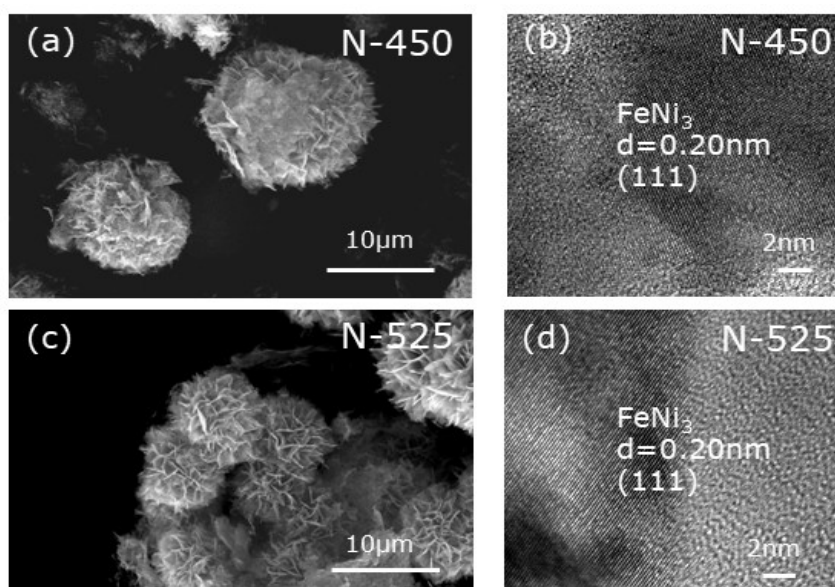

Figure S4 (a) SEM and (b) HRTEM images of N-450; (c) SEM and (d) HRTEM images of N-525.

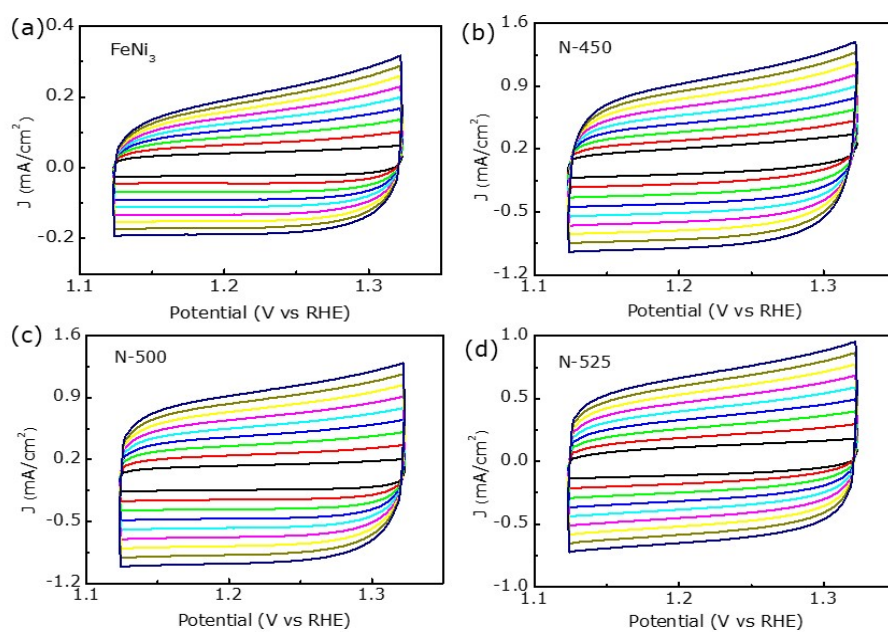

Figure S5. the cyclic voltammetry (CV) curve of (a) FeNi<sub>3</sub>, (b) N-450, (c) N-500, and (d) N-525.

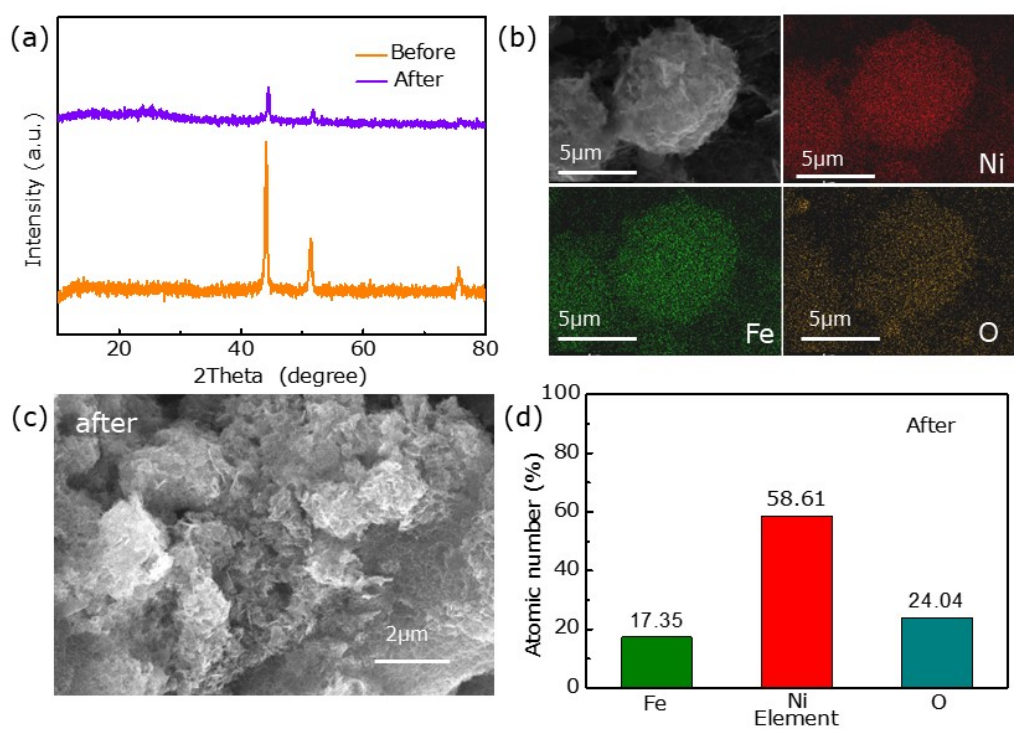

Figure S6 (a) XRD patterns before and after the stability test (b) Element distributions and (c) SEM image (d) EDX spectra after the stability test of N-500.

Table S1. Comparison of OER catalytic performance of Fe-Ni-based catalysts.

| Catalyst                                             | $j$ (mA cm <sup>-2</sup> ) | $\eta$ (mV) | Tafel slope  |
|------------------------------------------------------|----------------------------|-------------|--------------|
| FeNi <sub>3</sub> @NCNT5                             | 10                         | 264         | 58.5         |
| FeNi <sub>3</sub> @NC6                               | 10                         | 277         | 77           |
| Fe-enriched-FeNi <sub>3</sub> /NC7                   | 10                         | 260         | 82           |
| NiFeC-800-58                                         | 10                         | 269         | 72           |
| FeNi <sub>3</sub> N/FeNi <sub>3</sub> 9              | 10                         | 254         | 76           |
| FeNi <sub>3</sub> @GCDs-1010                         | 10                         | 238         | 48.7         |
| FeNiNC-550-311                                       | 10                         | 340         | 86.67        |
| Fe <sub>3</sub> O <sub>4</sub> /Ni <sub>3</sub> FeN2 | 10                         | 261         | 43.6         |
| Ni-FeO <sub>x</sub> /FeNi <sub>3</sub> /NF12         | 50                         | 267         | 78.6         |
| NiFeCoS <sub>x</sub> @FeNi <sub>3</sub> 13           | 10                         | 210         | 45           |
| Ni:Fe = 7.5:2.5/CF14                                 | 15                         | 330         | 37           |
| FeNi <sub>3</sub> /Ni <sub>2</sub> P@NCNTs15         | 10                         | 298         | 81.82        |
| Fe <sub>0.2</sub> Ni <sub>0.8</sub> /NC-600-a16      | 20                         | 290         | 76           |
| <b>N-FeNi<sub>3</sub></b>                            | <b>10</b>                  | <b>251</b>  | <b>34.63</b> |

## References

- 1.H. Wang, J. He, L. Ge, Z. Xu, W. Zhou and Z. Shao, *Journal of Electroanalytical Chemistry*, 2021, **884**.
- 2.N. Ma, G. Chen, Y. Zhu, H. Sun, J. Dai, H. Chu, R. Ran, W. Zhou, R. Cai and Z. Shao, *Small*, 2020, **16**, e2002089.
- 3.Y. Dong, J. Ran, Q. Liu, G. Zhang, X. Jiang and D. Gao, *RSC Advances*, 2021, **11**, 30448-30454.
- 4.J. Zhang, J. Li, C. Zhong, P. Xi, D. Chao and D. Gao, *Nano Lett*, 2021, **21**, 8166-8174.
- 5.D. Chen, Q. Sun, C. Han, Y. Guo, Q. Huang, W. A. Goddard and J. Qian, *Journal of Materials Chemistry A*, 2022
- 6.D. Chen, J. Zhu, X. Mu, R. Cheng, W. Li, S. Liu, Z. Pu, C. Lin and S. Mu, *Applied Catalysis B: Environmental*, 2020, **268**.
- 7.K. Chen, S. Kim, R. Rajendiran, K. Prabakar, G. Li, Z. Shi, C. Jeong, J. Kang and O. L. Li, *J Colloid Interface Sci*, 2021, **582**, 977-990.
- 8.J. Ding, Q. Sun, L. Zhong, X. Wang, L. Chai, Q. Li, T.-T. Li, Y. Hu, J. Qian and S. Huang, *Electrochimica Acta*, 2020, **354**.
- 9.X. Fu, J. Zhu, B. Ao, X. Lyu and J. Chen, *Inorganic Chemistry Communications*, 2020, **113**.
- 10.Z. Li, X. Xu, X. Lu, C. He, J. Huang, W. Sun and L. Tian, *J Colloid Interface Sci*, 2022, **615**, 273-281.
- 11.G. Liu, B. Wang, L. Wang, W. Wei, Y. Quan, C. Wang, W. Zhu, H. Li and J. Xia, *Green Energy & Environment*, 2022, **7**, 423-431.
- 12.A. Qayum, X. Peng, J. Yuan, Y. Qu, J. Zhou, Z. Huang, H. Xia, Z. Liu, D. Q. Tan, P. K. Chu, F. Lu and L. Hu, *ACS Appl Mater Interfaces*, 2022, **14**, 27842-27853.
- 13.J. Shen, Q. Li, W. Zhang, Z. Cai, L. Cui, X. Liu and J. Liu, *Journal of Materials Chemistry A*, 2022, **10**, 5442-5451.
- 14.X. Wei, W. Chen, N. Liu and H. Fan, *Journal of Alloys and Compounds*, 2020, **830**.
- 15.Q. Yang, Y. Fu, W. Liao, Y. Zhang, M. Qian, H. Dai, X. Tong and T. Chen, *International Journal of Hydrogen Energy*, 2021, **46**, 39736-39742.
- 16.Y. Zhou, Y. Li, L. Zhang, L. Zhang, L. Li, J. Tian, M. Wang, J. Xu, B. Dai and Y. Li, *Chemical Engineering Journal*, 2020, **394**.
